# Supplementary material for: Novel Findings on CCR1 Receptor in CNS Disorders: A Pathogenic Marker Useful in Controlling Neuroimmune and Neuroinflammatory Mechanisms in Parkinson’s Disease
Source: MDPI journal article supplement (doi:10.3390/ijms25084337), 2024-04-14
Supplement: s1 [file s1]

|                                     | SHAM          | MPTP         | MPTP+BX471<br>3 mg/kg | MPTP+BX471 10<br>mg/kg | MPTP+BX471<br>30 mg/kg |
|-------------------------------------|---------------|--------------|-----------------------|------------------------|------------------------|
| POLE TEST<br>“Time to turn”         | 1,00 ± 0,535  | 5,38 ± 0,518 | 5,25 ± 0,463          | 4,50 ± 0,535           | 2,75 ± 0,463           |
| POLE TEST<br>“Total Time”           | 6,63 ± 2,39   | 26,9 ± 1,73  | 26,6 ± 1,30           | 23,8 ± 1,67            | 10,0 ± 2,45            |
| EPM TEST<br>“Time in<br>closed arm” | 37,0 ± 13,2   | 237 ± 28,6   | 235 ± 20,2            | 206 ± 10,0             | 96,3 ± 6,18            |
| EPM TEST<br>“Total Time”            | 5,88 ± 2,17   | 22,1 ± 1,81  | 21,5 ± 1,31           | 19,5 ± 1,07            | 11,5 ± 1,60            |
| Nissl Staining<br>TH                | 409 ± 46,2    | 169 ± 22,2   | 178 ± 36,4            | 238 ± 53,5             | 377 ± 45,8             |
| IHC DAT                             | 6,13 ± 0,354  | 1,50 ± 0,535 | 1,63 ± 0,518          | 2,38 ± 0,518           | 4,50 ± 0,535           |
| IHC $\alpha$ -syn                   | 0,625 ± 0,518 | 6,63 ± 0,744 | 6,38 ± 0,518          | 5,63 ± 0,744           | 2,13 ± 0,354           |
| ELISA Kit<br>p- $\alpha$ -syn       | 4,55 ± 1,03   | 91,2 ± 4,40  | 88,2 ± 3,25           | 83,5 ± 6,55            | 23,4 ± 5,51            |
| IF GFAP                             | 2,38 ± 0,744  | 19,1 ± 1,55  | /                     | 17,1 ± 0,835           | 6,88 ± 1,81            |
| IF IBA-1                            | 2,13 ± 0,641  | 27,6 ± 2,92  | /                     | 24,4 ± 2,56            | 7,38 ± 1,41            |
| WB I $\kappa$ B $\alpha$            | 98,0 ± 13,6   | 10,1 ± 5,51  | /                     | 28,6 ± 8,95            | 116 ± 14,6             |
| WB INOS                             | 15,2 ± 2,94   | 67,7 ± 11,7  | /                     | 49,6 ± 14,0            | 15,8 ± 3,77            |
| WB COX-2                            | 2,82 ± 2,08   | 103 ± 8,27   | /                     | 65,9 ± 10,5            | 28,4 ± 9,78            |
| WB NF $\kappa$ B                    | 1,30 ± 0,628  | 70,1 ± 7,15  | /                     | 60,7 ± 7,59            | 8,49 ± 3,47            |
| WB TNF- $\alpha$                    | 11,4 ± 6,19   | 93,1 ± 10,9  | /                     | 79,5 ± 8,08            | 15,5 ± 3,52            |
| WB IL-1 $\beta$                     | 2,60 ± 1,60   | 75,9 ± 6,22  | /                     | 60,9 ± 9,97            | 29,2 ± 7,09            |
| ELISA Kit<br>TNF- $\alpha$          | 18,8 ± 11,3   | 640 ± 38,2   | /                     | 566 ± 59,7             | 245 ± 59,4             |
| ELISA Kit<br>IL-1 $\beta$           | 23,9 ± 8,97   | 1087 ± 72,7  | /                     | 952 ± 93,8             | 440 ± 108              |
| WB CCR1                             | 38,5 ± 8,36   | 94,8 ± 4,35  | /                     | 82,6 ± 9,25            | 43,9 ± 6,98            |
| WB RANTES                           | 29,5 ± 4,22   | 83,5 ± 4,31  | /                     | 77,4 ± 4,01            | 7,30 ± 2,03            |
| WB MIP-1 $\alpha$                   | 4,07 ± 2,44   | 91,9 ± 8,56  | /                     | 80,6 ± 6,16            | 61,3 ± 10,7            |
| ELISA Kit<br>CCR1                   | 1,23 ± 0,317  | 7,77 ± 0,908 | /                     | 6,58 ± 0,856           | 2,52 ± 0,426           |
| IF MAST<br>CELL<br>CHYMASE          | 1,13 ± 1,36   | 13,6 ± 1,85  | /                     | 11,4 ± 1,69            | 4,38 ± 1,06            |
| IF MAST<br>CELL<br>TRYPTASE         | 0,875 ± 0,835 | 15,0 ± 1,20  | /                     | 13,4 ± 1,19            | 3,88 ± 0,835           |
| IF CD4                              | 4,88 ± 2,70   | 67,3 ± 10,4  | /                     | 57,6 ± 5,78            | 23,9 ± 5,03            |
| IF CD8                              | 4,85 ± 2,17   | 73,5 ± 6,35  | /                     | 64,5 ± 7,76            | 23,4 ± 4,03            |

**S1. Numerical data of the experiment expressed as mean ± SD**
